# Supplementary material for: Malignant Bowel Obstruction: A Retrospective Multicenter Cohort Study
Source: MDPI journal article supplement (doi:10.3390/jcm13010263), 2024-01-02
Supplement: s1 [file s1]

| <b>Supplementary Table S1. Patient Comorbidities</b> |          |          |
|------------------------------------------------------|----------|----------|
| <b>Disease</b>                                       | <b>N</b> | <b>%</b> |
| Hypertension                                         | 26       | 37,1     |
| Coronary Disease                                     | 14       | 20       |
| Hypothyroidism                                       | 12       | 17,1     |
| Dyslipidemia                                         | 8        | 11,4     |
| Heart arrhythmia                                     | 7        | 10       |
| Non-GI malignancy                                    | 7        | 10       |
| Diabetes                                             | 7        | 10       |
| Prostate hyperplasia                                 | 5        | 7,1      |
| Abdominal aortic aneurysm                            | 3        | 4,3      |
| Heart valve abnormality                              | 2        | 2,9      |
| COPD                                                 | 2        | 2,9      |
| Rheumatoid arthritis                                 | 2        | 2,9      |

Supplementary Table S1. The comorbidities of patients that underwent surgery due to malignant bowel obstruction.

| <b>Supplementary Table S2. Surgical History</b> |          |          |
|-------------------------------------------------|----------|----------|
| <b>Surgical Operation</b>                       | <b>N</b> | <b>%</b> |
| Appendectomy                                    | 9        | 12,9     |
| Inguinal hernia repair                          | 7        | 10       |
| Laparoscopic Cholecystectomy                    | 6        | 8,6      |
| Uterus resection                                | 4        | 5,7      |
| Hip arthroplasty                                | 3        | 4,3      |
| Left hemicolectomy                              | 2        | 2,9      |
| Intestinal resection                            | 2        | 2,9      |
| Right extended colectomy                        | 2        | 2,9      |
| Mastectomy                                      | 2        | 2,9      |
| Lumpectomy                                      | 2        | 2,9      |
| Prostatectomy                                   | 2        | 2,9      |
| Hartmann's procedure                            | 1        | 1,4      |
| Abdominal aortic aneurysm repair                | 1        | 1,4      |
| Distal Pancreatectomy                           | 1        | 1,4      |
| Subtotal gastrectomy                            | 1        | 1,4      |
| Total gastrectomy                               | 1        | 1,4      |
| Sigmoidectomy                                   | 1        | 1,4      |
| Splenectomy                                     | 1        | 1,4      |
| Abdominoperineal resection                      | 1        | 1,4      |
| Esophageal perforation                          | 1        | 1,4      |
| Low anterior resection                          | 1        | 1,4      |

Supplementary Table S2. The surgical history of patients that underwent surgery due to malignant bowel obstruction.

| Supplementary Table S3. Histopathological assessment |                            |            |      |
|------------------------------------------------------|----------------------------|------------|------|
|                                                      |                            | N          | %    |
| Malignancy type                                      | Colon adenocarcinoma       | 59         | 89,4 |
|                                                      | Pancreatic adenocarcinoma  | 2          | 3,0  |
|                                                      | Gastric adenocarcinoma     | 2          | 3,0  |
|                                                      | Neuroendocrine tumor (NET) | 2          | 3,0  |
|                                                      | Lymphoma                   | 1          | 1,5  |
| Differentiation                                      | Low                        | 21         | 43,8 |
|                                                      | Moderate                   | 24         | 50,0 |
|                                                      | High                       | 2          | 4,2  |
|                                                      | In situ                    | 1          | 2,1  |
| Margins                                              | Free                       | 44         | 89,8 |
|                                                      | Infiltrated                | 5          | 10,2 |
| Perineural or perivascular infiltrations             | Yes                        | 41         | 85,4 |
|                                                      | No                         | 7          | 14,6 |
| T (Tumor)                                            | Tis                        | 2          | 4,3  |
|                                                      | T1                         | 0          | 0,0  |
|                                                      | T2                         | 2          | 4,3  |
|                                                      | T3                         | 22         | 47,8 |
|                                                      | T4                         | 20         | 43,5 |
| N (Node)                                             | 0                          | 20         | 44,4 |
|                                                      | 1                          | 11         | 24,4 |
|                                                      | 2                          | 12         | 26,7 |
|                                                      | 3                          | 2          | 4,4  |
| M (Metastasis)                                       | No                         | 16         | 40,0 |
|                                                      | Yes                        | 24         | 60,0 |
| No of harvested lymph nodes, mean (SD)               |                            | 18,6 (9,7) |      |
| No of infiltrated lymph nodes, mean (SD)             |                            | 2,9 (5,3)  |      |

Supplementary Table S3. Histopathological characteristics of specimens after malignant bowel obstruction.

| Supplementary Table S4. Malignancy origin |    |      |
|-------------------------------------------|----|------|
| Organ                                     | N  | %    |
| Sigmoid colon                             | 30 | 42,9 |
| Rectum                                    | 15 | 21,4 |
| Ascending colon                           | 9  | 12,9 |
| Cecum                                     | 5  | 7,1  |
| Transverse colon                          | 5  | 7,1  |
| Descending colon                          | 5  | 7,1  |
| Other than intestine                      | 5  | 7,1  |
| Small intestine                           | 2  | 2,9  |

Supplementary Table S4. The primary malignancy type of tumors causing malignant bowel obstruction.
